# Supplementary material for: Transcription termination between polo and snap, two closely spaced tandem genes of D. melanogaster
Source: PubMed Central journal article supplement — Transcription. 2012 Jul 1;3(4):198–212. doi: 10.4161/trns.21967 (PMC3654770; doi:10.4161/trns.21967), 2012-07-01
Supplement: tran-3-198-s01.pdf [file tran-3-198-s01.pdf]

**Supplementary Material to:**

Telmo Henriques, Zhe Ji, Sue Mei Tan-Wong, Alexandre M. Carmo, Bin Tian, Nicholas J Proudfoot and Alexandra Moreira. Transcription termination between *polo* and *snap*, two closely spaced tandem genes of *D. melanogaster*.

Transcription 2012; 3(4); <http://dx.doi.org/10.4161/trans.21967>;

<http://www.landesbioscience.com/journals/transcription/article/21967/>

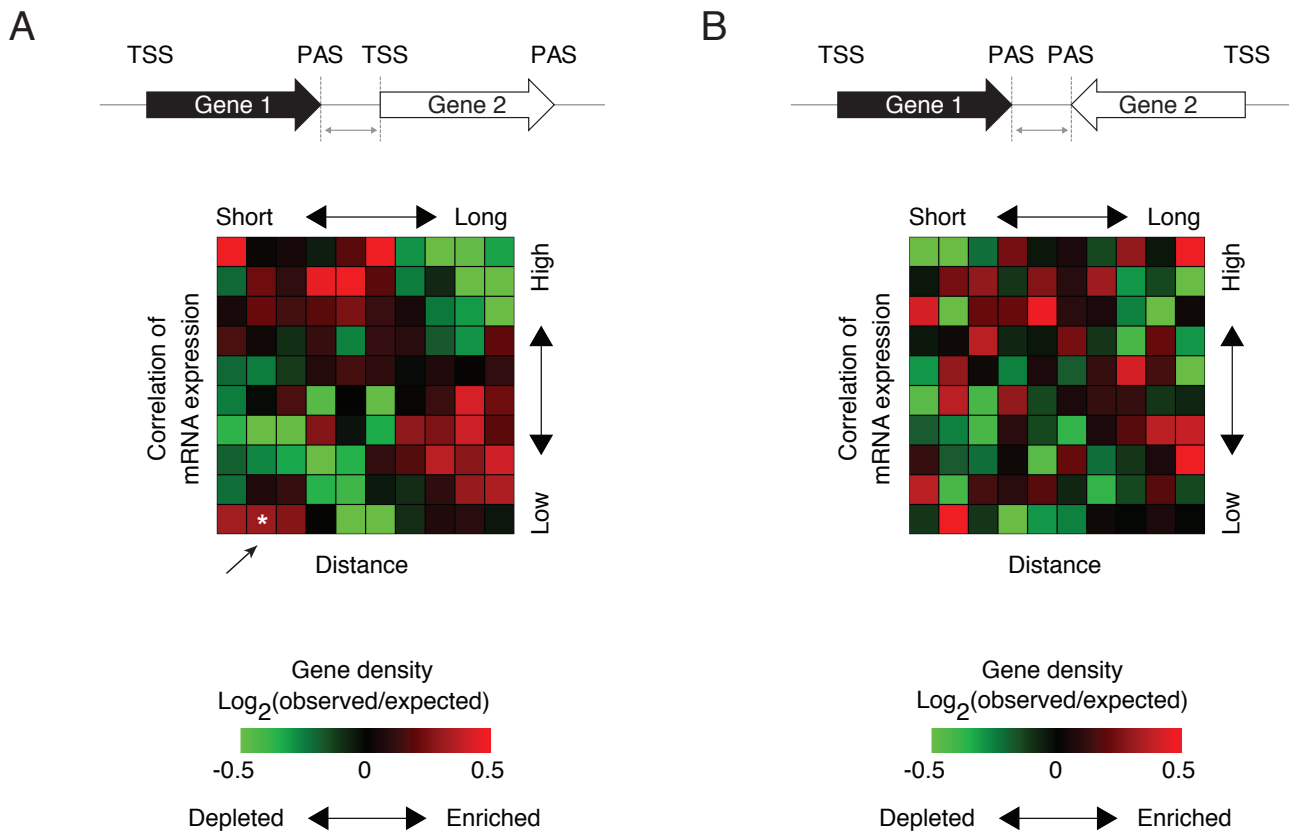

**C**

| Tissue                     | <i>polo</i> | <i>snap</i> |
|----------------------------|-------------|-------------|
|                            | mRNA signal |             |
| Brain                      | 0 +/- 0     | 2057 +/- 81 |
| Head                       | 1 +/- 0     | 954 +/- 61  |
| Eye                        | 0 +/- 0     | 648 +/- 14  |
| Thoraco abdominal ganglion | 3 +/- 1     | 2365 +/- 82 |
| Salivary gland             | 5 +/- 1     | 91 +/- 6    |
| Crop                       | 7 +/- 2     | 206 +/- 15  |
| Midgut                     | 11 +/- 1    | 79 +/- 1    |
| Tubule                     | 17 +/- 14   | 192 +/- 6   |
| Hindgut                    | 5 +/- 2     | 152 +/- 5   |
| Heart                      | 3 +/- 1     | 131 +/- 9   |
| Fat body                   | 16 +/- 6    | 85 +/- 10   |
| Ovary                      | 1260 +/- 15 | 36 +/- 0    |
| Testis                     | 643 +/- 27  | 19 +/- 1    |
| Male accessory glands      | 1 +/- 0     | 167 +/- 13  |
| Virgin spermatheca         | 22 +/- 0    | 196 +/- 20  |
| Mated spermatheca          | 14 +/- 4    | 171 +/- 16  |
| Adult carcass              | 22 +/- 13   | 138 +/- 5   |
| Larval CNS                 | 746 +/- 21  | 644 +/- 71  |
| Larval Salivary gland      | 18 +/- 3    | 105 +/- 7   |
| Larval midgut              | 34 +/- 5    | 80 +/- 6    |
| Larval tubule              | 16 +/- 1    | 222 +/- 9   |
| Larval hindgut             | 55 +/- 4    | 120 +/- 7   |
| Larval fat body            | 147 +/- 62  | 150 +/- 16  |
| Larval trachea             | 192 +/- 12  | 73 +/- 15   |
| Larval carcass             | 121 +/- 14  | 92 +/- 4    |
| S2 cells (growing)         | 771 +/- 21  | 121 +/- 2   |
| Whole fly                  | 613 +/- 8   | 191 +/- 13  |

data from <http://www.flyatlas.org/>

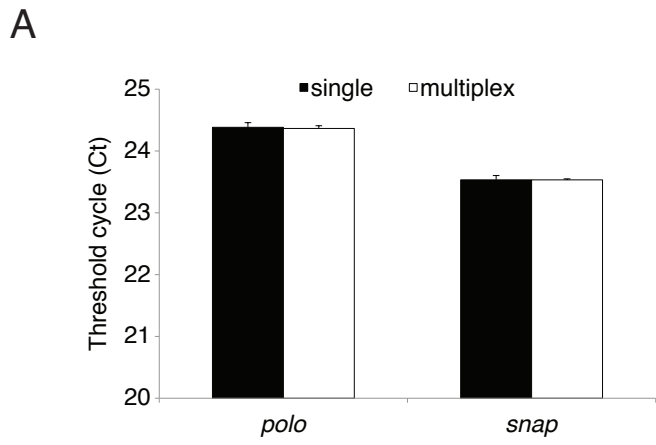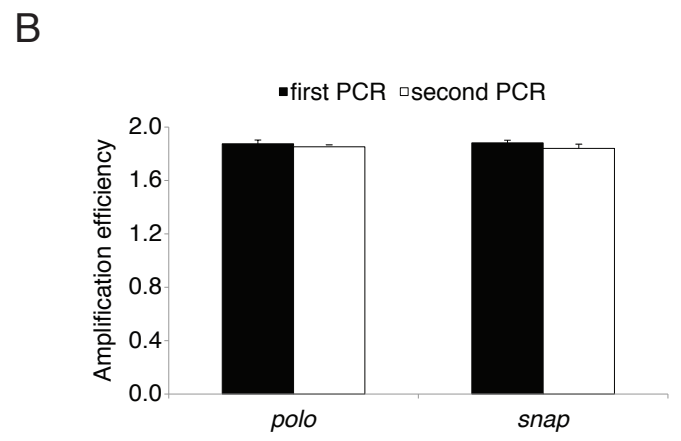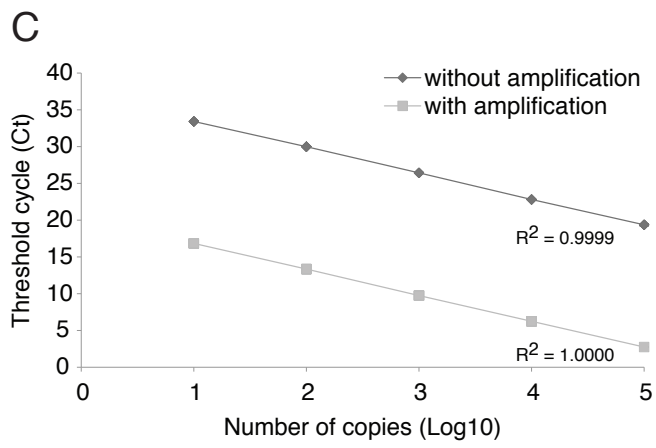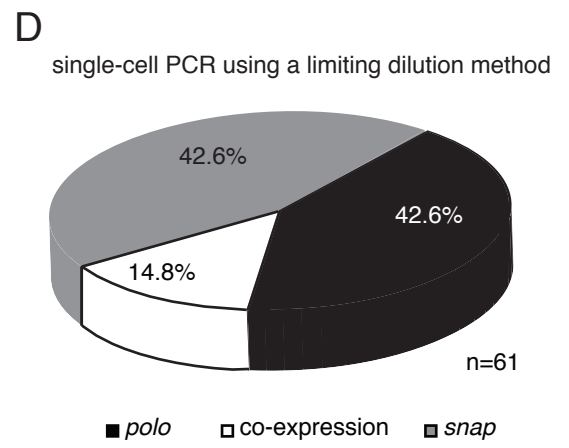

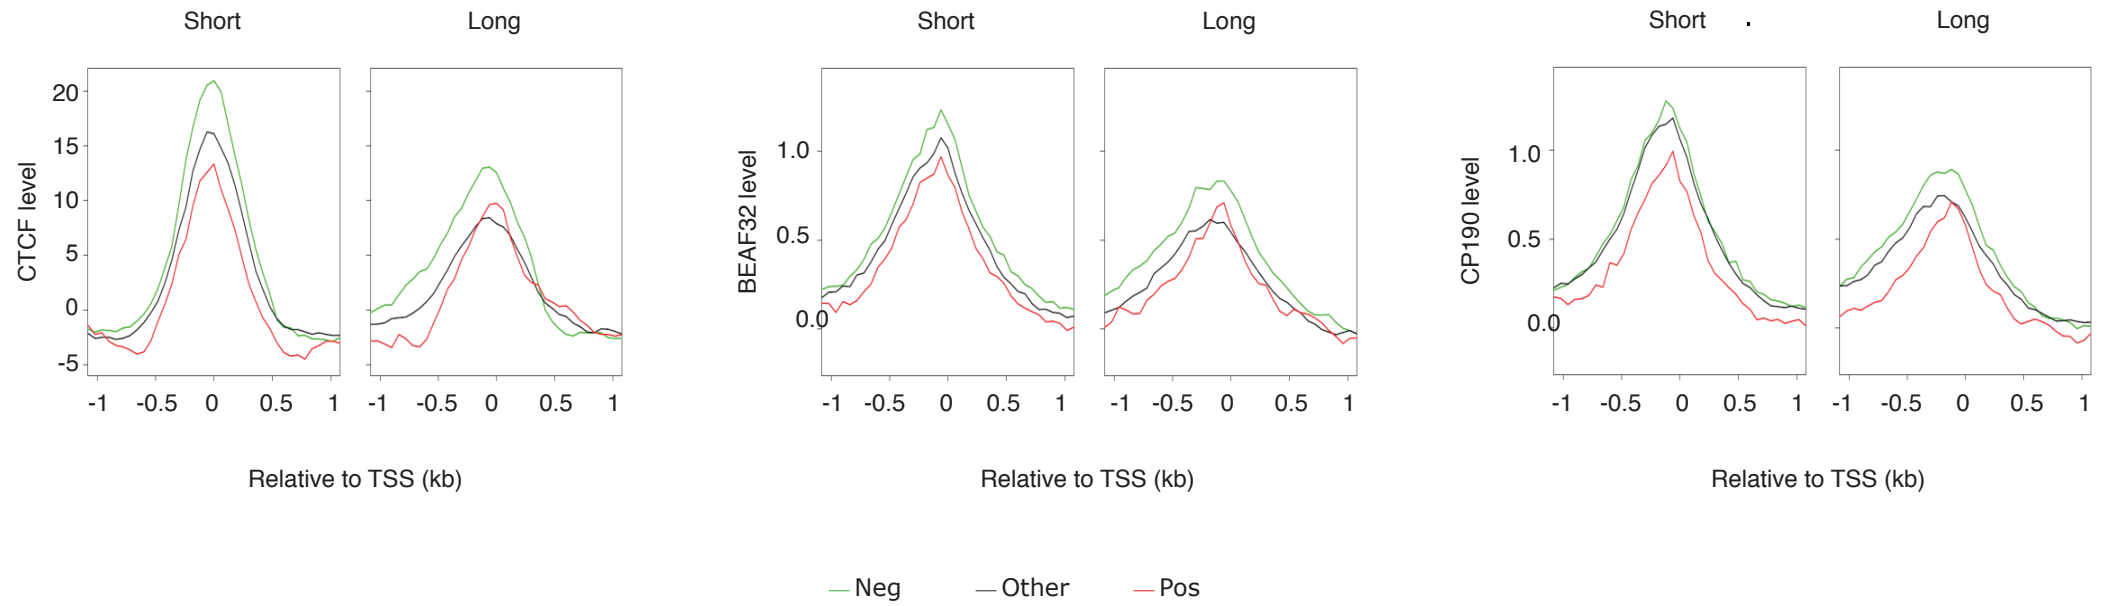

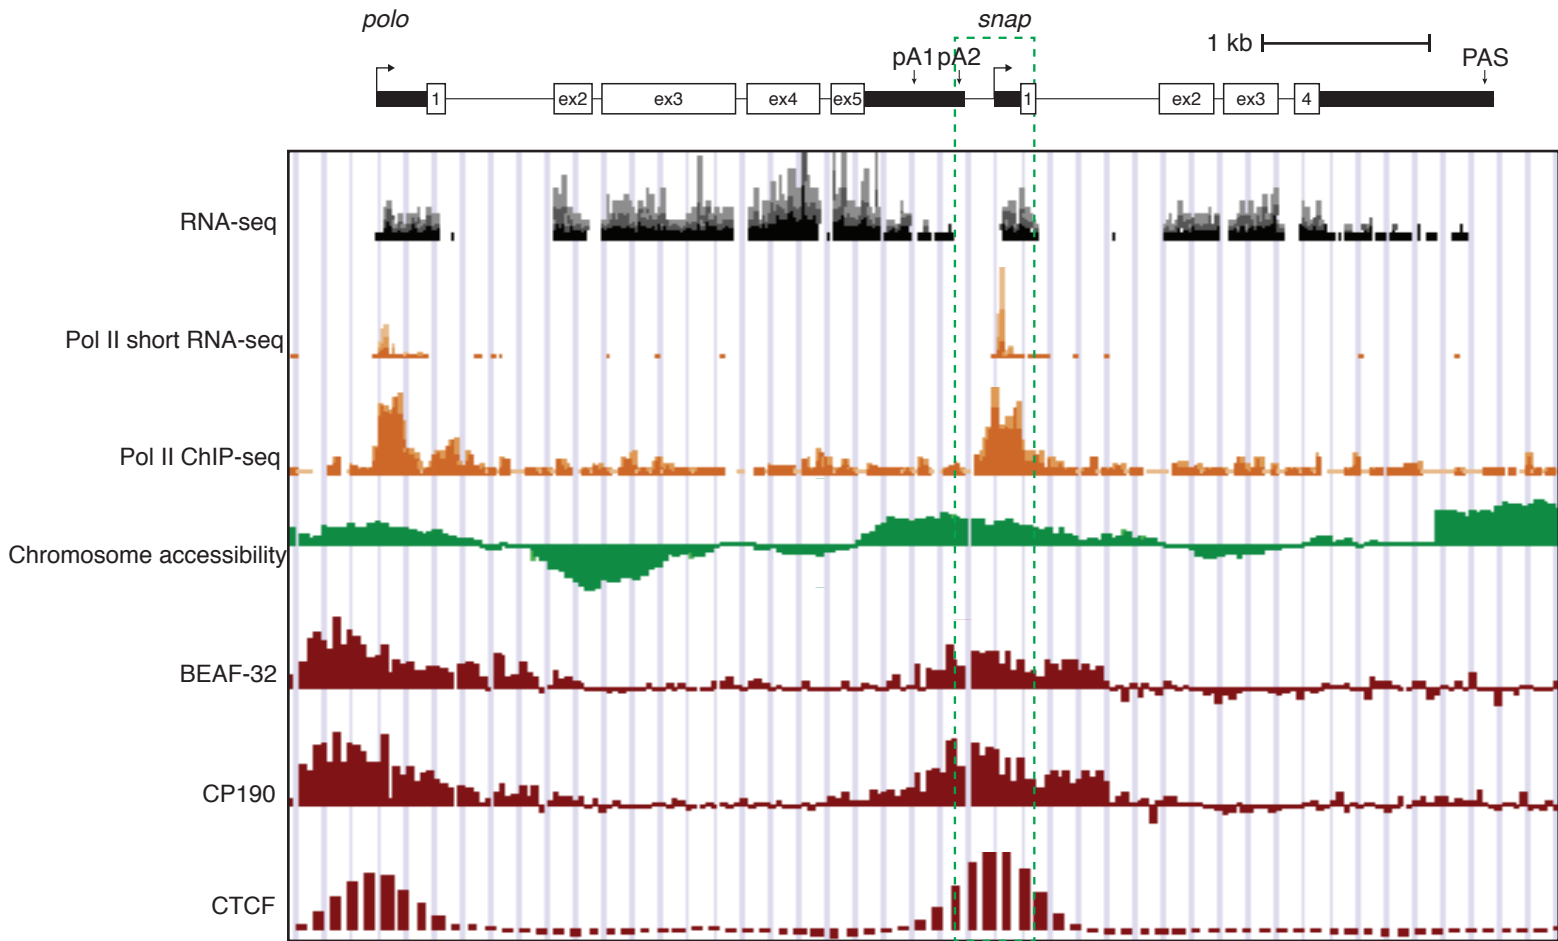

A

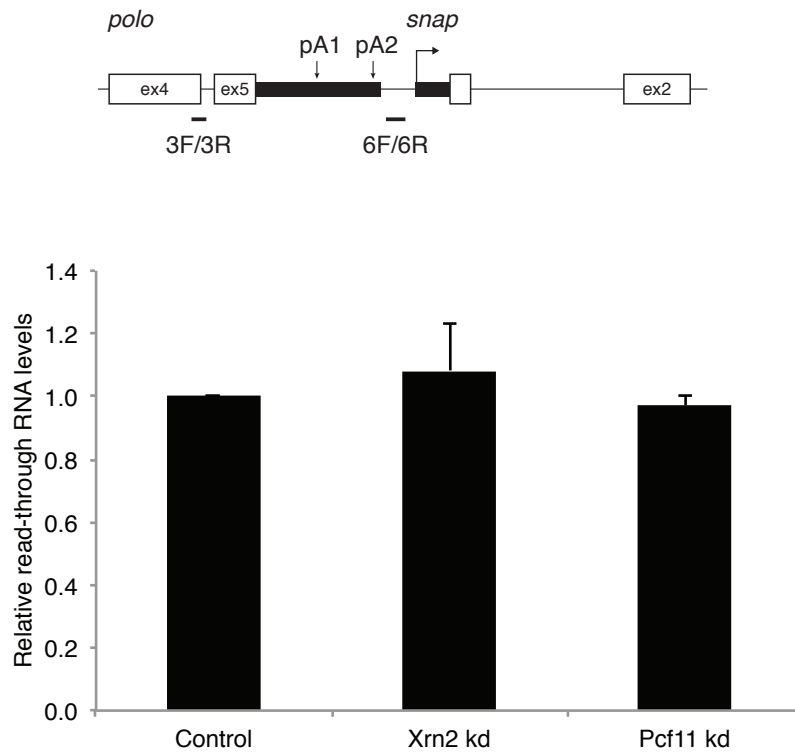

B

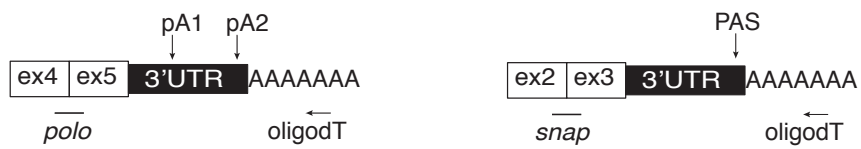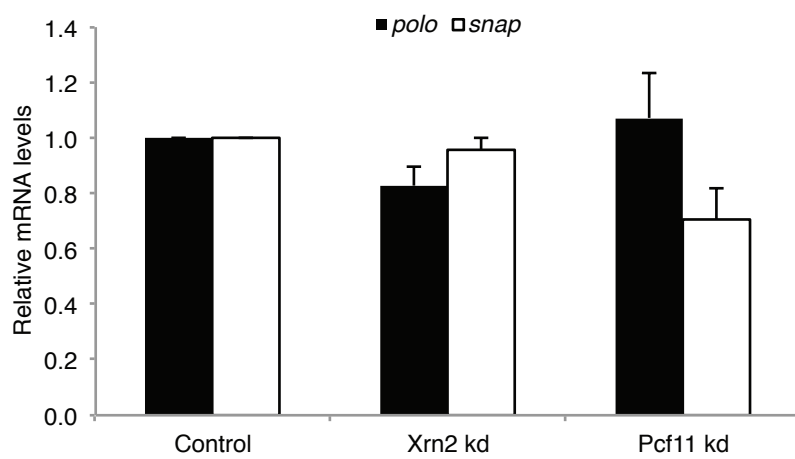

**Figure S1.** *polo-snap* and similar gene pairs show negative correlation of expression. Related to Fig. 1. (A) Schematic representation of the analysed tandem genes across *Drosophila* genome (dm3); heat map representation of correlation between gene distance (tandem only) and correlation of gene expression. All the tandem genes were distributed in a 10x10 table, based on gene distance (x-axis) and correlation of expression (y-axis). Number of genes in each cell of the table was normalized to an expected number using randomized data. Relative gene density, calculated by  $\log_2$  (observed number/expected number), is presented in a heat map according to the colour scale shown in the figure. The  $r$  and  $P$  shown in the figure are based on Spearman correlation. The gene expression correlation between *polo* and *snap* is -0.58. The cell containing *polo-snap* is marked by a white dot. (B) Schematic representation of the analysed convergent gene pairs across the *Drosophila* genome (dm3); heat map representation of correlation between gene distance (convergent only) and correlation of gene expression. (C) Correlation of gene expression between *polo* and *snap*. The data is derived from the FlyAtlas database where gene expression was analysed across 26 fly tissues.

**Figure S2.** Competition, amplification efficiency and linearity reactions for single-cell PCR. Related to Fig. 1. (A) Competition of PCR amplifications. Aliquots of cDNA from S2 cells were amplified separately for each gene, or in multiplex in the first PCR round. Triplicates of these reactions were further amplified in a second real-time PCR. Comparison of threshold cycle mean values (Ct) obtained for each different gene amplified separately (black bars) or in multiplex (white bars). No significant differences were observed between the two amplification conditions for each different gene (t-test,  $p$ -value >0.1). (B) Aliquots of cDNA from *Drosophila* S2 cells were amplified separately for each gene and each type of PCR reaction to determine PCR efficiency. Slope values from the triplicates were assessed on the exponential phase of the real-time amplification reaction, and PCR efficiencies were determined using LinRegPCR 11.4 software. Mean $\pm$ SEM of PCR efficiencies is shown for the first (black bars) and second (white bars) PCRs. The significance of these differences was evaluated by ANOVA. Within each PCR, all primer combinations had the same efficiency. We also found no significant difference in the variance between the first and second PCR amplifications (ANOVA,  $p$ -value >0.1). (C) Linearity of double-round PCR amplification. A double-stranded synthesized DNA sequence from rp49 was amplified by a single PCR (◆) or by a two-step PCR of 15 pre-amplification cycles (■). Mean $\pm$ SEM of triplicates is included,

although SEMs frequently overlap with the symbols as we found little or no variation. Linear regression curves of these amplified standards are indicated and have similar high correlation coefficients ( $r^2 \geq 0.9999$ ). (D) S2 cells were diluted in Schneider's Insect Medium (Sigma) supplemented with 10% FBS at a concentration of 1cell/ 5ml and 5ml of this suspension was added to each well of a 96-well plate and immediately frozen in liquid nitrogen. Single-cell PCR was performed as in **Fig. 1E-F**.

**Figure S3.** CTCF, BEAF32 and CP190 levels around the promoter region for different gene sets. Related to Fig. 2. Insulator levels (left, CTCF; middle, BEAF32; right, CP190). Only tandem gene pairs were used, and the Short, Long, Neg, Pos and Other gene pairs are the same as described with Fig. 2. The x-axes of all plots are distance relative to TSS with 0 being TSS.

**Figure S4.** Molecular features at the *polo* and *snap* transcriptional units. Related to Fig. 2. The several datasets used in this study (see Materials and Methods) were uploaded into the UCSC genome browser and a snapshot around *polo-snap* was taken.

**Figure S5.** Transcription termination occurs efficiently in the short intergenic region between *polo* and *snap* and is independent of Xrn2 and Pcf11. Related to Fig. 3. (A) RT-qPCR of read-through RNA. The diagram shows the primer positions for reverse transcription and qPCR analysis. The graph shows RT-PCR quantitation of endogenous read-through (ratio between 6F/6R and 3F/3R probes) RNA in S2 cells depleted for Xrn2 and Pcf11 compared to DsRed kd (Control). Primers used for reverse transcription (3R and 6R) and qPCR (3F/3R and 6F/6R) are shown in the diagram. (B) *polo* and *snap* messenger RNA levels upon Xrn2 and Pcf11 depletion. The diagram shows the primer positions for qPCR analysis. The amount of *polo* and *snap* were measured by qPCR. The graph shows the endogenous mRNA levels for *polo* and *snap* in S2 cells where DsRed (Control), Xrn2 and Pcf11 were depleted. OligodT was used for reverse transcription, as depicted in the diagram. For all the panels the value for Control was set at 1 and the error bars show s.e.m.

**Table S1.** Datasets used in this study

| Datasets                 | GEO accession # | Sample source | References |
|--------------------------|-----------------|---------------|------------|
| Chromosome accessibility | GSM441282       | S2 cells      | 27         |
| RNA-seq                  | GSM480160       | S2 cells      | 63         |
| Insulator-CTCF200        | GSM499649       | S2 cells      | 28         |



|                                |           |                   |    |
|--------------------------------|-----------|-------------------|----|
| Insulator-BEAF32               | GSM409067 | E0-12h embryos    | 28 |
| Insulator-CP190                | GSM409068 | E0-12h embryos    | 28 |
| Pol II ChIP-seq                | GSM463297 | S2 cells          | 28 |
| Short RNA-seq                  | GSM463298 | S2 cells          | 28 |
| Gene expression across tissues | GSE7763   | 26 fly tissues*   | 26 |
| TFIIB and RNAP II clusters     | NA        | Stage 4-5 embryos | 43 |

\*: 26 fly tissues include Brain, Head, Eye, Thoracoabdominal ganglion, Salivary gland, Crop, Midgut, Tubule, Hindgut, Heart, Fat body, Ovary, Testis, Male accessory glands, Virgin spermatheca, Mated spermatheca, Adult carcass, Larval CNS, Larval Salivary gland, Larval midgut, Larval tubule, Larval hindgut, Larval fat body, Larval trachea, Larval carcass, and S2 cells (growing).

**Table S2.** Oligonucleotides

**single cell RT-PCR**

|              |                                              |
|--------------|----------------------------------------------|
| polo ex4 F   | CGCGTATGCCCCATTTACAC                         |
| polo exon4 F | CCGTACAACATGTGCCGTAG                         |
| polo exon5 R | CTTTAGACACGCCGTTCTCC                         |
| snap ex2 F   | CAAGAAGGTGGACGTGGAGA                         |
| snap exon2 F | CAACTGCCTGATGAAGTCCA                         |
| snap exon3 R | GACCGACTCTTCACCCTTGA                         |
| rp49 ex2 F   | CCAGCATAACAGGCCCAAGAT                        |
| rp49 exon2 F | AAGAAGCGCACCAAGCACT                          |
| rp49 exon3 R | GTTTCGATCCGTAACCGATGT                        |
| rp49 ex3 T7R | taatacgactcactatagggagaGTTTCGATCCGTAACCGATGT |

**BrUTP-NRO/ ChIP**

*polo and snap*

|    |                         |
|----|-------------------------|
| 1F | GCTTTGTGCTTGTTTTTCGT    |
| 1R | TTTACTACGGACTGCCCCTTT   |
| 2F | GTTCTTGCCCAGCTCTTGTC    |
| 2R | AGATTGGCCTTGAGGAAGGT    |
| 3F | CCGTACAACATGTGCCGTAG    |
| 3R | CCAGATGTACATGATGCCGA    |
| 4F | AAGGCCGAATGTTAGTTTAACG  |
| 4R | TTTCGATATGAAGGGGAAGG    |
| 5F | ACGTGTTTCGAAATGCCTAT    |
| 5R | ACACTTAAACACTTTGCAGCAG  |
| 6F | CTGAAAAAAGATTGTTTGCAACG |
| 6R | GGGCTGTAACGTTTGTTTCGT   |
| 7F | ACCACTTCTGCGGTCACAC     |

7R GTCACCCATGTCGAGGATTT  
8F GGACGCCATCGAGTGCTA  
8R TGGACTTCATCAGGCAGTTG  
9F GCAGTACCCAGCATTCCA  
9R CCCTCGATGTTCTGTTCCCTCTA

CG30046

1F GGAATTTTCGCTCAGTTTGC  
1R CAGGGACCCAAGCAGAAGTA  
2F CCCACAGTTCGGATTATCGT  
2R TCGTTTCAAGCATGGAGTCA  
3F TATCCGGAACTCCCATGAAA  
3R AAGGTCTTCCCCACTAAAGTCC  
4F ACACCTGGAGGAGATGTGGA  
4R ACTCATCCGCACAGAAGTTG  
5F GCAACTATGGCGATTCCAG  
5R GGAACACTTCTCGCATACCC  
6F TGCAGACATGGAATTTGCAC  
6R TCATTTCGAGCTACGCAGAGA  
7F GTTAAAGCGCCTCGACTTTG  
7R GAATGATGCAGGCTGACTGA  
8F TTTTGGTATGCATCTCCCATT  
8R TTGTTGGTGTGCTGTTTGGT  
9F GCGAGCAATCGGTTTTCTAT  
9R CAGGATCAGCAGGCTCATAA

**qPCR**

7SL RNA F TTGGCTAAGGAGGGATGAAC  
7SL RNA R CTA CTGCCTACCACGGGAAC  
dPcf11 F GCATCAGCTAAAGCACCAAA  
dPcf11 R TATAATCGGCGGACTTGGAG  
dXrn2 F GTTCAAGGCCAGGGACAAG  
dXrn2 R AAGGATCCGTGGTCCTGATT  
TFIIB F CACAAGCATCCGAGCATAAG  
TFIIB R GTAGGACTGTCTGATGGTGACG  
eGFP F TATATCATGGCCGACAAGCA  
eGFP R GTTGTGGCGGATCTTGAAGT  
polo exon3 F GCGATATCGAGAGCCTGTACC  
polo exon4 F CCGTACAACATGTGCCGTAG  
polo exon5 R CTTTAGACACGCCGTTCTCC  
rp49 exon2 F AAGAAGCGCACCAAGCACT  
rp49 exon3 R GTTCGATCCGTAACCGATGT  
snap exon2 F CAACTGCCTGATGAAGTCCA  
snap exon3 R GACCGACTCTTCACCCTTGA  
snap exon4 R CCCTCGATGTTCTGTTCCCTCTA

## RNAi

|            |                                                  |
|------------|--------------------------------------------------|
| DsRed T7F  | taatacgactcactatagggagaCTTCAAGGTGCGCATGGAG       |
| DsRed T7R  | taatacgactcactatagggagaGGACTTGAACCTCCACCAGGTAGTG |
| dPcf11 T7F | taatacgactcactatagggagaGCGAAGTGGCTTTTCCTAGTG     |
| dPcf11 T7R | taatacgactcactatagggagaTCTCCCAAAGGAATGATGC       |
| dXrn2 T7F  | taatacgactcactatagggagaATCCATCCGTGCACGCATC       |
| dXrn2 T7R  | taatacgactcactatagggagaGTTGCAGATGTGCGCAGGGA      |
| TFIIB T7F  | taatacgactcactatagggagaCTCCGCTCATCGAGGACTAC      |
| TFIIB T7R  | taatacgactcactatagggagaACGTCCCGGTACAATATCCA      |

## *polo* and *snap* cloning

|                           |                                  |
|---------------------------|----------------------------------|
| intergenic polo HindIII F | TAGTAGaagcttGGTAACGGCCATAGAATTTG |
| snap intergenic SpeI R    | TAGTAGactagtCCAAGTGACAGGTGCAAA   |
| snap intron1 SpeI R       | TAGTAGactagtAGTCGCACTTTTGCGCTATT |
| polo ex3R                 | CTTTCCGTTGATAAGATTAGTGAGC        |
| polo int4F                | GTTTGTATAATTGTACAGCATCGGC        |
| snap ex2R                 | CAGATTATTGGGATCACTTTTCGTA        |
| snap int3F                | GTGGGTATCAGTTTGCTTAAGTTTT        |
| pnoMT F                   | CAAGTGAATCATCTCAGTGCAACT         |
| pnoMT R                   | GGCCTCGTGATACGCCTATT             |

## 3C analysis

|              |                              |
|--------------|------------------------------|
| 1F           | GCGGTTAAACACAGTGTTGCGCA      |
| 1R           | GCGTCAGCTGAATTGGTGTGCC       |
| 2F           | GCTCAGAACGAGGAGTATCGCCG      |
| 2R           | GCCGAAGAACCGCATGCG           |
| ApoI 2R      | GGAGCCCCTTCCAAGAAAAT         |
| 3F           | CTCCTTCGAGGTGGACATCTGGTC     |
| 3R           | CGCCGCCGGTTTCCTTAAGTAG       |
| 4F           | GCCCAGAAAGTATCCTCCTCTCCCATC  |
| 4R           | AGGCATTTTCGAAACACGTTTGCTTAG  |
| anchor F     | TGTAATATTGTGCGTTTCGTAGTGCGCT |
| anchor R     | AGCTGCCCTAAACGTTGCAAACA      |
| polo exon4 F | CCGTACAACATGTGCCGTAG         |
| polo exon5 R | CTTTAGACACGCCGTTCTCC         |
| rp49 1F      | CGACGTATCGATGTTTTTTTCCACACCA |
| rp49 1R      | GACTAACGCAGTTCAACTCGAAACCG   |
| rp49 2F      | CAGTGGGTCAGTGCACTAATGGCTACT  |
| rp49 2R      | CACAATCCTCGTTGGCACTCACC      |

## 3' RACE analysis

|                        |                                            |
|------------------------|--------------------------------------------|
| 3' RACE adapter primer | GACCACGCGTATCGATGTGCGACTTTTTTTTTTTTTTTTTVN |
| anchor primer          | GACCACGCGTATCGATGTGCGAC                    |
| polo 3F                | CCGTACAACATGTGCCGTAG                       |
